# Supplementary material for: Factors determining the occurrence of submicroscopic malaria infections and their relevance for control
Source: PubMed Central journal article supplement — Nat Commun. 2012 Dec 4;3:1237–. doi: 10.1038/ncomms2241 (PMC3535331; doi:10.1038/ncomms2241), 2012-12-04
Supplement: ncomms2241-s1.pdf [file ncomms2241-s1.pdf]

## Factors determining the occurrence of submicroscopic malaria infections and their relevance for control

Lucy C Okell, Teun Bousema, Jamie T Griffin, André Lin Ouédraogo, Azra C Ghani, Chris J Drakeley (2012)

**Supplementary Table S1. 106 included PCR and slide-prevalence surveys: data and references**

| Author<br>(publication year),<br>reference | Country      | Location    | Year data<br>collected | Number<br>tested by<br>PCR | Number<br>positive by<br>PCR | Number tested<br>by microscopy | Number positive<br>by microscopy | PCR<br>method | Microscopy method* |              | Age group         | Included in previous JID 2009<br>systematic review, DOI:<br>10.1086/644781? |
|--------------------------------------------|--------------|-------------|------------------------|----------------------------|------------------------------|--------------------------------|----------------------------------|---------------|--------------------|--------------|-------------------|-----------------------------------------------------------------------------|
|                                            |              |             |                        |                            |                              |                                |                                  |               | N fields           | N leucocytes |                   |                                                                             |
| Vafa (2007) <sup>61</sup>                  | Mali         | Mopti       | 2001                   | 212                        | 85                           | 212                            | 34                               | nested        | -                  | 300          | children & adults | yes                                                                         |
| Vafa (2007) <sup>61</sup>                  | Mali         | Mopti       | 2001                   | 214                        | 66                           | 214                            | 32                               | nested        | -                  | 300          | children & adults | yes                                                                         |
| Roper (1996) <sup>62</sup>                 | Sudan        | Daraweesh   | 1993                   | 79                         | 10                           | 79                             | 2                                | nested        | 200                | -            | children & adults | yes                                                                         |
| Roper (1996) <sup>62</sup>                 | Sudan        | Daraweesh   | 1994                   | 79                         | 15                           | 79                             | 4                                | nested        | 200                | -            | children & adults | yes                                                                         |
| Roper (1996) <sup>62</sup>                 | Sudan        | Daraweesh   | 1994                   | 79                         | 19                           | 79                             | 8                                | nested        | 200                | -            | children & adults | yes                                                                         |
| Roper (1996) <sup>62</sup>                 | Sudan        | Daraweesh   | 1994                   | 73                         | 14                           | 73                             | 0                                | nested        | 200                | -            | children & adults | yes                                                                         |
| John (2005) <sup>63</sup>                  | Kenya        | Kipsamoite  | 1999                   | 123                        | 13                           | 123                            | 10                               | nested        | -                  | 200          | children & adults | yes                                                                         |
| John (2005) <sup>63</sup>                  | Kenya        | Kipsamoite  | 2000                   | 267                        | 25                           | 267                            | 17                               | nested        | -                  | 200          | children & adults | yes                                                                         |
| John (2005) <sup>63</sup>                  | Kenya        | Kipsamoite  | 2000                   | 273                        | 16                           | 273                            | 8                                | nested        | -                  | 200          | children & adults | yes                                                                         |
| John (2005) <sup>63</sup>                  | Kenya        | Kipsamoite  | 2001                   | 152                        | 9                            | 152                            | 2                                | nested        | -                  | 200          | children & adults | yes                                                                         |
| John (2005) <sup>63</sup>                  | Kenya        | Kipsamoite  | 2002                   | 228                        | 33                           | 228                            | 18                               | nested        | -                  | 200          | children & adults | yes                                                                         |
| Ofulla (2005) <sup>64</sup>                | Kenya        | Kanyawegi   |                        | 301                        | 251                          | 301                            | 220                              | nested        | -                  | 200          | children & adults | yes                                                                         |
| Stich (2006) <sup>65</sup>                 | Burkina Faso | Bourasso    | 2000                   | 201                        | 185                          | 201                            | 162                              | nested        | -                  | -            | children & adults | yes                                                                         |
| Alves (2002) <sup>66</sup>                 | Brazil       | Portuchuelo | 1998                   | 164                        | 16                           | 175                            | 4                                | nested        | 200                | -            | children & adults | yes                                                                         |
| Alves (2002) <sup>66</sup>                 | Brazil       | Portuchuelo | 1999                   | 142                        | 25                           | 142                            | 2                                | nested        | 200                | -            | children & adults | yes                                                                         |

| Author<br>(publication year),<br>Reference | Country                   | Location            | Year data<br>collected | Number<br>tested by<br>PCR | Number<br>positive by<br>PCR | Number tested<br>by microscopy | Number positive<br>by microscopy | PCR<br>method | Microscopy method* |              | Age group         | Included in previous JID 2009<br>systematic review, DOI:<br>10.1086/644781? |
|--------------------------------------------|---------------------------|---------------------|------------------------|----------------------------|------------------------------|--------------------------------|----------------------------------|---------------|--------------------|--------------|-------------------|-----------------------------------------------------------------------------|
|                                            |                           |                     |                        |                            |                              |                                |                                  |               | N fields           | N leucocytes |                   |                                                                             |
| Alves (2002) <sup>66</sup>                 | Brazil                    | Portuchuelo         | 1999                   | 125                        | 2                            | 125                            | 0                                | nested        | 200                | -            | children & adults | yes                                                                         |
| Alves (2002) <sup>66</sup>                 | Brazil                    | Ji-Paraná           | 2000                   | 128                        | 58                           | 172                            | 10                               | nested        | 200                | -            | children & adults | yes                                                                         |
| Muller (2001) <sup>67</sup>                | Sao Tome &<br>Principe    | Riboque             | 1998                   | 491                        | 321                          | 491                            | 194                              | nested        | -                  | 200          | children & adults | yes                                                                         |
| Alves (2006) <sup>68</sup>                 | Republic of Cabo<br>Verde | Santiago<br>Island  | 1998-2000              | 338                        | 3                            | 338                            | 0                                | nested        | -                  | 500          | children & adults | yes                                                                         |
| Alves (2006) <sup>68</sup>                 | Republic of Cabo<br>Verde | Santiago<br>Island  | 2003                   | 261                        | 10                           | 261                            | 0                                | nested        | -                  | 500          | children & adults | yes                                                                         |
| Cortes (2004) <sup>69</sup>                | Papua New<br>Guinea       | Wosera              | 2000                   | 628                        | 330                          | 628                            | 175                              | nested        | -                  | -            | children & adults | yes                                                                         |
| Roshanravan<br>(2003) <sup>70</sup>        | Peru                      | Iquitos             | 1999                   | 819                        | 28                           | 819                            | 12                               | nested        | 100                | -            | children & adults | yes                                                                         |
| Zwetyenga<br>(1998) <sup>71</sup>          | Senegal                   | Ndiop               | 1994                   | 143                        | 110                          | 143                            | 52                               | nested        | 200                | -            | children & adults | yes                                                                         |
| Toma (2001) <sup>72</sup>                  | Lao PDR                   | Phavang             |                        | 143                        | 77                           | 143                            | 46                               | nested        | 100                | -            | children & adults | yes                                                                         |
| Toma (2001) <sup>72</sup>                  | Lao PDR                   | Sisomsouen          |                        | 193                        | 20                           | 193                            | 7                                | nested        | 100                | -            | children & adults | yes                                                                         |
| Mehlotra (2002) <sup>73</sup>              | Papua New<br>Guinea       | Wosera              | 1998-1999              | 340                        | 179                          | 1759                           | 352                              | nested        | -                  | 200          | children & adults | yes                                                                         |
| Mehlotra (2002) <sup>73</sup>              | Papua New<br>Guinea       | Liksul              | 2000                   | 330                        | 195                          | 972                            | 217                              | nested        | -                  | 200          | children & adults | yes                                                                         |
| Owusu-Agyei<br>(2002) <sup>74</sup>        | Ghana                     | Kassena-<br>Nankana | 2000                   | 308                        | 252                          | 308                            | 217                              | nested        | 200                | -            | children & adults | yes                                                                         |
| Felger (1995) <sup>75</sup>                | Papua New<br>Guinea       | East Sepik          | 1992                   | 304                        | 144                          | 304                            | 75                               | nested        | 100                | -            | children & adults | yes                                                                         |
| Snounou (1993) <sup>76</sup>               | Guinea Bissau             | Bor                 | 1992                   | 110                        | 90                           | 110                            | 28                               | nested        | -                  | 200          | children & adults | yes                                                                         |
| Snounou (1993) <sup>76</sup>               | Guinea Bissau             | Bor                 | 1992                   | 79                         | 69                           | 79                             | 38                               | nested        | -                  | 200          | children & adults | yes                                                                         |
| Ntoumi (1995) <sup>77</sup>                | Senegal                   | Dielmo              | 1992                   | 65                         | 50                           | 65                             | 50                               | nested        | 300                | -            | children & adults | yes                                                                         |

| Author<br>(publication year),<br>Reference | Country              | Location          | Year data<br>collected | Number<br>tested by<br>PCR | Number<br>positive by<br>PCR | Number tested<br>by microscopy | Number positive<br>by microscopy | PCR<br>method   | Microscopy method* |              | Age group         | Included in previous JID 2009<br>systematic review, DOI:<br>10.1086/644781? |
|--------------------------------------------|----------------------|-------------------|------------------------|----------------------------|------------------------------|--------------------------------|----------------------------------|-----------------|--------------------|--------------|-------------------|-----------------------------------------------------------------------------|
|                                            |                      |                   |                        |                            |                              |                                |                                  |                 | N fields           | N leucocytes |                   |                                                                             |
| Marques (2005) <sup>78</sup>               | Mozambique           | Manchiana         | 2001                   | 70                         | 50                           | 70                             | 43                               | nested          | -                  | 500          | children & adults | yes                                                                         |
| Marques (2005) <sup>78</sup>               | Mozambique           | Manchiana         | 2002                   | 70                         | 55                           | 70                             | 43                               | nested          | -                  | 500          | children & adults | yes                                                                         |
| Marques (2005) <sup>78</sup>               | Mozambique           | Ilha Josina       | 2001                   | 81                         | 73                           | 81                             | 53                               | nested          | -                  | 500          | children & adults | yes                                                                         |
| Marques (2005) <sup>78</sup>               | Mozambique           | Ilha Josina       | 2002                   | 87                         | 79                           | 87                             | 66                               | nested          | -                  | 500          | children & adults | yes                                                                         |
| Khaminsou<br>(2008) <sup>79</sup>          | Lao PDR              | Houy Jang         | 2006                   | 130                        | 18                           | 130                            | 12                               | semi-<br>nested | 100                | -            | children & adults | yes                                                                         |
| Khaminsou<br>(2008) <sup>79</sup>          | Lao PDR              | Keng Thong        | 2006                   | 130                        | 32                           | 130                            | 22                               | semi-<br>nested | 100                | -            | children & adults | yes                                                                         |
| Nsobya (2004) <sup>80</sup>                | Uganda               | Kampala           | 2000                   | 316                        | 114                          | 316                            | 55                               | nested          | 100                | -            | children only     | yes                                                                         |
| Touré (2006) <sup>81</sup>                 | Gabon                | Dienga            |                        | 278                        | 58                           | 278                            | 20                               | nested          | -                  | -            | adults only       | yes                                                                         |
| Guerra-Neira<br>(2006) <sup>82</sup>       | Equatorial<br>Guinea | Sacriba           | 1998                   | 36                         | 24                           | 36                             | 18                               | semi-<br>nested | -                  | -            | children only     | yes                                                                         |
| Guerra-Neira<br>(2006) <sup>82</sup>       | Equatorial<br>Guinea | Bareso            | 1998                   | 35                         | 22                           | 35                             | 14                               | semi-<br>nested | -                  | -            | children only     | yes                                                                         |
| Guerra-Neira<br>(2006) <sup>82</sup>       | Equatorial<br>Guinea | Ureka             | 1998                   | 81                         | 50                           | 81                             | 40                               | semi-<br>nested | -                  | -            | children only     | yes                                                                         |
| Silue (2006) <sup>83</sup>                 | Cote d'Ivoire        | Taabo             | 2001                   | 424                        | 356                          | 424                            | 232                              | nested          | -                  | 200          | children only     | yes                                                                         |
| Kobbe (2006) <sup>84</sup>                 | Ghana                | Afigya<br>Sekyere | 2003                   | 962                        | 175                          | 1069                           | 158                              | nested          | 200                | -            | children only     | yes                                                                         |
| Paganotti (2006) <sup>85</sup>             | Burkina Faso         | Bassy &<br>Zanga  | 2002                   | 92                         | 89                           | 92                             | 76                               | nested          | 200                | -            | children only     | yes                                                                         |
| Paganotti (2006) <sup>85</sup>             | Burkina Faso         | Bassy &<br>Zanga  | 2002                   | 58                         | 56                           | 58                             | 51                               | nested          | 200                | -            | children only     | yes                                                                         |
| Mayor (2003) <sup>86</sup>                 | Mozambique           | Manhica           | 1999                   | 178                        | 76                           | 249                            | 34                               | nested          | -                  | -            | adults only       | yes                                                                         |
| Mayor (2003) <sup>86</sup>                 | Mozambique           | Manhica           | 1997                   | 310                        | 135                          | 625                            | 154                              | nested          | -                  | -            | children only     | yes                                                                         |

| Author<br>(publication year),<br>reference | Country             | Location          | Year data<br>collected | Number<br>tested by<br>PCR | Number<br>positive by<br>PCR | Number tested<br>by microscopy | Number positive<br>by microscopy | PCR<br>method | Microscopy method* |              | Age group         | Included in previous JID 2009<br>systematic review, DOI:<br>10.1086/644781? |
|--------------------------------------------|---------------------|-------------------|------------------------|----------------------------|------------------------------|--------------------------------|----------------------------------|---------------|--------------------|--------------|-------------------|-----------------------------------------------------------------------------|
|                                            |                     |                   |                        |                            |                              |                                |                                  |               | N fields           | N leucocytes |                   |                                                                             |
| Vafa (2008) <sup>87</sup>                  | Senegal             | Niakhar           | 2002                   | 372                        | 164                          | 372                            | 130                              | nested        | 200                | -            | children only     | yes                                                                         |
| Vafa (2008) <sup>87</sup>                  | Senegal             | Niakhar           | 2003                   | 372                        | 190                          | 372                            | 130                              | nested        | 200                | -            | children only     | yes                                                                         |
| Wataya (1993) <sup>88</sup>                | Solomon Islands     | Guadalcanal       | 1991                   | 98                         | 8                            | 98                             | 8                                | nested        | 1000               | -            | children & adults | yes                                                                         |
| Dal-Bianco (2007) <sup>89</sup>            | Gabon               | Lambarene         | 2005-2006              | 470                        | 244                          | 493                            | 57                               | nested        | 100                | -            | adults only       | yes                                                                         |
| Peyerl-Hoffman<br>(2001) <sup>90</sup>     | Uganda              | Kabarole          | 1997-1998              | 406                        | 225                          | 406                            | 140                              | nested        | 100                | -            | children & adults | yes                                                                         |
| Cerutti (2007) <sup>91</sup>               | Brazil              | Espírito<br>Santo | 2002-2003              | 1527                       | 10                           | 1777                           | 0                                | nested        | 100                | -            | children & adults | yes                                                                         |
| Dent (2007) <sup>92</sup>                  | Kenya               | Kanyawegi         | 2003                   | 201                        | 141                          | 201                            | 117                              | PCR-LDR       | -                  | -            | children & adults | yes                                                                         |
| Mueller (2009) <sup>93</sup>               | Papua New<br>Guinea | Jama              | 2005                   | 203                        | 71                           | 203                            | 45                               | PCR-LDR       | 100                | -            | children & adults | no                                                                          |
| Mueller (2009) <sup>93</sup>               | Papua New<br>Guinea | Sengo             | 2005                   | 153                        | 76                           | 153                            | 45                               | PCR-LDR       | 100                | -            | children & adults | no                                                                          |
| Mueller (2009) <sup>93</sup>               | Papua New<br>Guinea | Mewi              | 2005                   | 133                        | 65                           | 133                            | 41                               | PCR-LDR       | 100                | -            | children & adults | no                                                                          |
| Mueller (2009) <sup>93</sup>               | Papua New<br>Guinea | Wapins            | 2005                   | 145                        | 72                           | 145                            | 31                               | PCR-LDR       | 100                | -            | children & adults | no                                                                          |
| Mueller (2009) <sup>93</sup>               | Papua New<br>Guinea | Bangeleko         | 2005                   | 172                        | 101                          | 172                            | 58                               | PCR-LDR       | 100                | -            | children & adults | no                                                                          |
| Mueller (2009) <sup>93</sup>               | Papua New<br>Guinea | Wombisa           | 2005                   | 174                        | 91                           | 174                            | 57                               | PCR-LDR       | 100                | -            | children & adults | no                                                                          |
| Mueller (2009) <sup>93</sup>               | Papua New<br>Guinea | Malba 1           | 2005                   | 163                        | 82                           | 163                            | 38                               | PCR-LDR       | 100                | -            | children & adults | no                                                                          |
| Mueller (2009) <sup>93</sup>               | Papua New<br>Guinea | Malba 2           | 2005                   | 174                        | 102                          | 174                            | 49                               | PCR-LDR       | 100                | -            | children & adults | no                                                                          |
| Mueller (2009) <sup>93</sup>               | Papua New<br>Guinea | Yeniko            | 2005                   | 184                        | 88                           | 184                            | 61                               | PCR-LDR       | 100                | -            | children & adults | no                                                                          |
| Mueller (2009) <sup>93</sup>               | Papua New<br>Guinea | Urita             | 2005                   | 166                        | 101                          | 166                            | 48                               | PCR-LDR       | 100                | -            | children & adults | no                                                                          |

| Author<br>(publication year),<br>reference | Country             | Location    | Year data<br>collected | Number<br>tested by<br>PCR | Number<br>positive by<br>PCR | Number tested<br>by microscopy | Number positive<br>by microscopy | PCR<br>method | Microscopy method* |              | Age group         | Included in previous JID 2009<br>systematic review, DOI:<br>10.1086/644781? |
|--------------------------------------------|---------------------|-------------|------------------------|----------------------------|------------------------------|--------------------------------|----------------------------------|---------------|--------------------|--------------|-------------------|-----------------------------------------------------------------------------|
|                                            |                     |             |                        |                            |                              |                                |                                  |               | N fields           | N leucocytes |                   |                                                                             |
| Mueller (2009) <sup>93</sup>               | Papua New<br>Guinea | Bonohoi     | 2005                   | 174                        | 95                           | 174                            | 57                               | PCR-LDR       | 100                | -            | children & adults | no                                                                          |
| Mueller (2009) <sup>93</sup>               | Papua New<br>Guinea | Wagarom     | 2005                   | 175                        | 117                          | 175                            | 75                               | PCR-LDR       | 100                | -            | children & adults | no                                                                          |
| Mueller (2009) <sup>93</sup>               | Papua New<br>Guinea | Sunuhu      | 2005                   | 188                        | 148                          | 188                            | 85                               | PCR-LDR       | 100                | -            | children & adults | no                                                                          |
| Mueller (2009) <sup>93</sup>               | Papua New<br>Guinea | Ilaita 3    | 2005                   | 148                        | 83                           | 148                            | 23                               | PCR-LDR       | 100                | -            | children & adults | no                                                                          |
| Mueller (2009) <sup>93</sup>               | Papua New<br>Guinea | Ilaita 4    | 2005                   | 175                        | 95                           | 175                            | 43                               | PCR-LDR       | 100                | -            | children & adults | no                                                                          |
| Ladeia-Andrade<br>(2009) <sup>94</sup>     | Brazil              | Unini river | 2002                   | 233                        | 8                            | 275                            | 4                                | nested        | 100                | -            | children & adults | no                                                                          |
| Ladeia-Andrade<br>(2009) <sup>94</sup>     | Brazil              | Unini river | 2002                   | 277                        | 20                           | 286                            | 2                                | nested        | 100                | -            | children & adults | no                                                                          |
| Ladeia-Andrade<br>(2009) <sup>94</sup>     | Brazil              | Jau river   | 2002                   | 47                         | 5                            | 47                             | 1                                | nested        | 100                | -            | children & adults | No                                                                          |
| Ladeia-Andrade<br>(2009) <sup>94</sup>     | Brazil              | Unini river | 2003                   | 320                        | 11                           | 321                            | 4                                | nested        | 100                | -            | children & adults | no                                                                          |
| Ladeia-Andrade<br>(2009) <sup>94</sup>     | Brazil              | Jau river   | 2003                   | 165                        | 1                            | 166                            | 0                                | nested        | 100                | -            | children & adults | no                                                                          |
| Rosanas-Urgell<br>(2010) <sup>95</sup>     | Papua New<br>Guinea | Ilahita     | 2008                   | 452                        | 198                          | 452                            | 115                              | nested        | 200                | -            | children only     | no                                                                          |
| Satoguina (2009) <sup>96</sup>             | Gambia              | Basse       | 2008                   | 841                        | 219                          | 934                            | 97                               | nested        | 100                | -            | children & adults | no                                                                          |
| Satoguina (2009) <sup>96</sup>             | Gambia              | Farafenni   | 2008                   | 689                        | 185                          | 729                            | 82                               | nested        | 100                | -            | children & adults | no                                                                          |
| Satoguina (2009) <sup>96</sup>             | Guinea Bissau       | Caio        | 2008                   | 818                        | 194                          | 834                            | 33                               | nested        | 100                | -            | children & adults | no                                                                          |
| Lin (2010) <sup>97</sup>                   | Papua New<br>Guinea | Ilaita      | 2006                   | 264                        | 131                          | 264                            | 86                               | PCR-LDR       | 100                | -            | children only     | no                                                                          |
| Steenkeste<br>(2010) <sup>98</sup>         | Cambodia            | Yasom       | 2001                   | 204                        | 136                          | 204                            | 75                               | nested        | 100                | -            | children & adults | no                                                                          |

| Author<br>(publication year),<br>reference | Country             | Location        | Year data<br>collected | Number<br>tested by<br>PCR | Number<br>positive by<br>PCR | Number tested<br>by microscopy | Number positive<br>by microscopy | PCR<br>method | Microscopy method* |              | Age group         | Included in previous JID 2009<br>systematic review, DOI:<br>10.1086/644781? |
|--------------------------------------------|---------------------|-----------------|------------------------|----------------------------|------------------------------|--------------------------------|----------------------------------|---------------|--------------------|--------------|-------------------|-----------------------------------------------------------------------------|
|                                            |                     |                 |                        |                            |                              |                                |                                  |               | N fields           | N leucocytes |                   |                                                                             |
| Steenkeste<br>(2010) <sup>98</sup>         | Cambodia            | Paor            | 2001                   | 209                        | 126                          | 209                            | 48                               | nested        | 100                | -            | children & adults | no                                                                          |
| Steenkeste<br>(2010) <sup>98</sup>         | Cambodia            | Chet            | 2001                   | 202                        | 119                          | 202                            | 53                               | nested        | 100                | -            | children & adults | no                                                                          |
| Steenkeste<br>(2010) <sup>98</sup>         | Cambodia            | Tung            | 2001                   | 141                        | 55                           | 141                            | 20                               | nested        | 100                | -            | children & adults | no                                                                          |
| Steenkeste<br>(2010) <sup>98</sup>         | Cambodia            | Touch           | 2001                   | 143                        | 88                           | 143                            | 49                               | nested        | 100                | -            | children & adults | no                                                                          |
| Steenkeste<br>(2010) <sup>98</sup>         | Cambodia            | Laing Av        | 2001                   | 118                        | 80                           | 118                            | 31                               | nested        | 100                | -            | children & adults | no                                                                          |
| Steenkeste<br>(2010) <sup>98</sup>         | Cambodia            | Pahoy           | 2001                   | 134                        | 87                           | 134                            | 38                               | nested        | 100                | -            | children & adults | no                                                                          |
| Katsuragawa<br>(2010) <sup>99</sup>        | Brazil              | Porto Velho     |                        | 205                        | 4                            | 205                            | 1                                | nested        | 100                | -            | children & adults | no                                                                          |
| da Silva (2010) <sup>100</sup>             | Brazil              | Granada         | 2004                   | 386                        | 35                           | 388                            | 6                                | nested        | 100                | -            | children & adults | no                                                                          |
| da Silva (2010) <sup>100</sup>             | Brazil              | Granada         | 2004                   | 379                        | 33                           | 378                            | 6                                | nested        | 100                | -            | children & adults | no                                                                          |
| da Silva (2010) <sup>100</sup>             | Brazil              | Granada         | 2005                   | 328                        | 22                           | 329                            | 0                                | nested        | 100                | -            | children & adults | no                                                                          |
| da Silva (2010) <sup>100</sup>             | Brazil              | Granada         | 2006                   | 334                        | 8                            | 351                            | 1                                | nested        | 100                | -            | children & adults | no                                                                          |
| Marfurt (2010) <sup>101</sup>              | Papua New<br>Guinea | Karimui         | 2003                   | 263                        | 102                          | 258                            | 34                               | nested        | -                  | -            | children & adults | no                                                                          |
| Marfurt (2010) <sup>101</sup>              | Papua New<br>Guinea | Karimui         | 2004                   | 347                        | 71                           | 346                            | 64                               | nested        | -                  | -            | children & adults | no                                                                          |
| Marfurt (2010) <sup>101</sup>              | Papua New<br>Guinea | Karimui         | 2005                   | 359                        | 131                          | 358                            | 82                               | nested        | -                  | -            | children & adults | no                                                                          |
| Marfurt (2010) <sup>101</sup>              | Papua New<br>Guinea | South<br>Wosera | 2003                   | 317                        | 129                          | 314                            | 55                               | nested        | -                  | -            | children & adults | no                                                                          |
| Marfurt (2010) <sup>101</sup>              | Papua New<br>Guinea | South<br>Wosera | 2004                   | 366                        | 147                          | 356                            | 96                               | nested        | -                  | -            | children & adults | no                                                                          |

| Author<br>(publication year),<br>reference                          | Country  | Location         | Year data<br>collected | Number<br>tested by<br>PCR | Number<br>positive by<br>PCR | Number tested<br>by microscopy | Number positive<br>by microscopy | PCR<br>method   | Microscopy method* |              | Age group         | Included in previous JID 2009<br>systematic review, DOI:<br>10.1086/644781? |
|---------------------------------------------------------------------|----------|------------------|------------------------|----------------------------|------------------------------|--------------------------------|----------------------------------|-----------------|--------------------|--------------|-------------------|-----------------------------------------------------------------------------|
|                                                                     |          |                  |                        |                            |                              |                                |                                  |                 | N fields           | N leucocytes |                   |                                                                             |
| Pacific Malaria<br>Initiative Survey<br>Group (2010) <sup>102</sup> | Vanuatu  | Erromango        | 2008                   | 413                        | 2                            | 413                            | 0                                | nested          | 100                | -            | children only     | no                                                                          |
| Liljander (2011) <sup>103</sup>                                     | Kenya    | Junju            | 2005                   | 337                        | 263                          | 337                            | 243                              | nested          | -                  | -            | children only     | no                                                                          |
| Liljander (2011) <sup>103</sup>                                     | Kenya    | Junju            | 2005                   | 360                        | 212                          | 360                            | 174                              | nested          | -                  | -            | children only     | no                                                                          |
| Gahutu (2011) <sup>104</sup>                                        | Rwanda   | Huye             | 2010                   | 545                        | 92                           | 545                            | 61                               | semi-<br>nested | -                  | -            | children only     | no                                                                          |
| Steenkeste<br>(2009) <sup>105</sup>                                 | Cambodia | Ping             | 2001                   | 102                        | 73                           | 102                            | 59                               | nested          | -                  | -            | children & adults | no                                                                          |
| Steenkeste<br>(2009) <sup>105</sup>                                 | Cambodia | Smach &<br>Pahoy | 2001                   | 235                        | 142                          | 235                            | 77                               | nested          | -                  | -            | children & adults | no                                                                          |

\* Microscopy method: number of fields or number of leucocytes examined before declaring a slide parasite-negative.

## References

61. Vafa M, Maiga B, Berzins K, Hayano M, Bereczky S, Dolo A, et al. Associations between the IL-4 -590 T allele and Plasmodium falciparum infection prevalence in asymptomatic Fulani of Mali. *Microbes Infect.* 2007 Jul;9(9):1043-8.
62. Roper C, Elhassan IM, Hviid L, Giha H, Richardson W, Babiker H, et al. Detection of very low level Plasmodium falciparum infections using the nested polymerase chain reaction and a reassessment of the epidemiology of unstable malaria in Sudan. *Am J Trop Med Hyg.* 1996 Apr;54(4):325-31.
63. John CC, McHugh MM, Moormann AM, Sumba PO, Ofulla AV. Low prevalence of Plasmodium falciparum infection among asymptomatic individuals in a highland area of Kenya. *Trans R Soc Trop Med Hyg.* 2005 Oct;99(10):780-6.
64. Ofulla AV, Moormann AM, Embury PE, Kazura JW, Sumba PO, John CC. Age-related differences in the detection of Plasmodium falciparum infection by PCR and microscopy, in an area of Kenya with holo-endemic malaria. *Ann Trop Med Parasitol.* 2005 Jun;99(4):431-5.
65. Stich A, Oster N, Abdel-Aziz IZ, Stieglbauer G, Coulibaly B, Wickert H, et al. Malaria in a holoendemic area of Burkina Faso: a cross-sectional study. *Parasitol Res.* 2006 May;98(6):596-9.
66. Alves FP, Durlacher RR, Menezes MJ, Krieger H, Silva LH, Camargo EP. High prevalence of asymptomatic Plasmodium vivax and Plasmodium falciparum infections in native Amazonian populations. *Am J Trop Med Hyg.* 2002 Jun;66(6):641-8.
67. Muller DA, Charlwood JD, Felger I, Ferreira C, do Rosario V, Smith T. Prospective risk of morbidity in relation to multiplicity of infection with Plasmodium falciparum in Sao Tome. *Acta Trop.* 2001 Feb 23;78(2):155-62.
68. Alves J, Roque AL, Cravo P, Valdez T, Jelinek T, Rosario VE, et al. Epidemiological characterization of Plasmodium falciparum in the Republic of Cabo Verde: implications for potential large-scale re-emergence of malaria. *Malar J.* 2006;5:32.
69. Cortes A, Mellombo M, Benet A, Lorry K, Rare L, Reeder JC. Plasmodium falciparum: distribution of msp2 genotypes among symptomatic and asymptomatic individuals from the Wosera region of Papua New Guinea. *Exp Parasitol.* 2004 Jan-Feb;106(1-2):22-9.
70. Roshanravan B, Kari E, Gilman RH, Cabrera L, Lee E, Metcalfe J, et al. Endemic malaria in the Peruvian Amazon region of Iquitos. *Am J Trop Med Hyg.* 2003 Jul;69(1):45-52.
71. Zwetyenga J, Rogier C, Tall A, Fontenille D, Snounou G, Trape JF, et al. No influence of age on infection complexity and allelic distribution in Plasmodium falciparum infections in Ndiop, a Senegalese village with seasonal, mesoendemic malaria. *Am J Trop Med Hyg.* 1998 Nov;59(5):726-35.
72. Toma H, Kobayashi J, Vannachone B, Arakawa T, Sato Y, Nambanya S, et al. A field study on malaria prevalence in southeastern Laos by polymerase chain reaction assay. *Am J Trop Med Hyg.* 2001 May-Jun;64(5-6):257-61.
73. Mehlotra RK, Kasehagen LJ, Baisor M, Lorry K, Kazura JW, Bockarie MJ, et al. Malaria infections are randomly distributed in diverse holoendemic areas of Papua New Guinea. *Am J Trop Med Hyg.* 2002 Dec;67(6):555-62.
74. Owusu-Agyei S, Smith T, Beck HP, Amenga-Etego L, Felger I. Molecular epidemiology of Plasmodium falciparum infections among asymptomatic inhabitants of a holoendemic malarious area in northern Ghana. *Trop Med Int Health.* 2002 May;7(5):421-8.
75. Felger I, Tavul L, Narara A, Genton B, Alpers M, Beck HP. The use of the polymerase chain reaction for more sensitive detection of Plasmodium falciparum. *P N G Med J.* 1995 Mar;38(1):52-6.
76. Snounou G, Pinheiro L, Goncalves A, Fonseca L, Dias F, Brown KN, et al. The importance of sensitive detection of malaria parasites in the human and insect hosts in epidemiological studies, as shown by the analysis of field samples from Guinea Bissau. *Trans R Soc Trop Med Hyg.* 1993 Nov-Dec;87(6):649-53.
77. Ntoumi F, Contamin H, Rogier C, Bonnefoy S, Trape JF, Mercereau-Puijalon O. Age-dependent carriage of multiple Plasmodium falciparum merozoite surface antigen-2 alleles in asymptomatic malaria infections. *Am J Trop Med Hyg.* 1995 Jan;52(1):81-8.
78. Marques PX, Saute F, Pinto VV, Cardoso S, Pinto J, Alonso PL, et al. Plasmodium species mixed infections in two areas of Manhica District, Mozambique. *Int J Biol Sci.* 2005;1(3):96-102.
79. Khaminsou N, Kritpetcharat O, Daduang J, Kritpetcharat P. A survey of malarial infection in endemic areas of Savannakhet province, Lao PDR and comparative diagnostic efficiencies of Giemsa staining, acridine orange staining, and semi-nested multiplex PCR. *Parasitol Int.* 2008 Jun;57(2):143-9.
80. Nsobya SL, Parikh S, Kironde F, Lubega G, Kamya MR, Rosenthal PJ, et al. Molecular evaluation of the natural history of asymptomatic parasitemia in Ugandan children. *J Infect Dis.* 2004 Jun 15;189(12):2220-6.
81. Toure FS, Mezui-Me-Ndong J, Ouwe-Missi-Oukem-Boyer O, Ollomo B, Mazier D, Bisser S. Submicroscopic Plasmodium falciparum infections before and after sulfadoxine-pyrimethamine and artesunate association treatment in Dienga, Southeastern Gabon. *Clin Med Res.* 2006 Sep;4(3):175-9.



82. Guerra-Neira A, Rubio JM, Royo JR, Ortega JC, Aunon AS, Diaz PB, et al. Plasmodium diversity in non-malaria individuals from the Bioko Island in Equatorial Guinea (West Central-Africa). *Int J Health Geogr*. 2006;5:27.
83. Silue KD, Felger I, Utzinger J, Beck HP, Smith TA, Tanner M, et al. [Prevalence, genetic diversity and multiplicity of Plasmodium falciparum infection in school children in central Cote d'Ivoire]. *Med Trop (Mars)*. 2006 Apr;66(2):149-56.
84. Kobbe R, Neuhoﬀ R, Marks F, Adjei S, Langefeld I, von Reden C, et al. Seasonal variation and high multiplicity of first Plasmodium falciparum infections in children from a holoendemic area in Ghana, West Africa. *Trop Med Int Health*. 2006 May;11(5):613-9.
85. Paganotti GM, Palladino C, Modiano D, Sirima BS, Raberg L, Diarra A, et al. Genetic complexity and gametocyte production of Plasmodium falciparum in Fulani and Mossi communities in Burkina Faso. *Parasitology*. 2006 May;132(Pt 5):607-14.
86. Mayor A, Saute F, Aponte JJ, Almeda J, Gomez-Olive FX, Dgedge M, et al. Plasmodium falciparum multiple infections in Mozambique, its relation to other malariological indices and to prospective risk of malaria morbidity. *Trop Med Int Health*. 2003 Jan;8(1):3-11.
87. Vafa M, Troye-Blomberg M, Anchang J, Garcia A, Migot-Nabias F. Multiplicity of Plasmodium falciparum infection in asymptomatic children in Senegal: relation to transmission, age and erythrocyte variants. *Malar J*. 2008;7:17.
88. Wataya Y, Arai M, Kubochi F, Mizukoshi C, Kakutani T, Ohta N, et al. DNA diagnosis of falciparum malaria using a double PCR technique: a field trial in the Solomon Islands. *Mol Biochem Parasitol*. 1993 Mar;58(1):165-7.
89. Dal-Bianco MP, Koster KB, Kombila UD, Kun JF, Grobusch MP, Ngoma GM, et al. High prevalence of asymptomatic Plasmodium falciparum infection in Gabonese adults. *Am J Trop Med Hyg*. 2007 Nov;77(5):939-42.
90. Peyerl-Hoffmann G, Jelinek T, Kilian A, Kabagambe G, Metzger WG, von Sonnenburg F. Genetic diversity of Plasmodium falciparum and its relationship to parasite density in an area with different malaria endemicities in West Uganda. *Trop Med Int Health*. 2001 Aug;6(8):607-13.
91. Cerutti C, Jr., Boulos M, Coutinho AF, Hatab Mdo C, Falqueto A, Rezende HR, et al. Epidemiologic aspects of the malaria transmission cycle in an area of very low incidence in Brazil. *Malar J*. 2007;6:33.
92. Dent AE, Yohn CT, Zimmerman PA, Vulule J, Kazura JW, Moormann AM. A polymerase chain reaction/ligase detection reaction fluorescent microsphere assay to determine Plasmodium falciparum MSP-119 haplotypes. *Am J Trop Med Hyg*. 2007 Aug;77(2):250-5.
93. Mueller I, Widmer S, Michel D, Maraga S, McNamara DT, Kiniboro B, et al. High sensitivity detection of Plasmodium species reveals positive correlations between infections of different species, shifts in age distribution and reduced local variation in Papua New Guinea. *Malar J*. 2009;8:41.
94. Ladeia-Andrade S, Ferreira MU, de Carvalho ME, Curado I, Coura JR. Age-dependent acquisition of protective immunity to malaria in riverine populations of the Amazon Basin of Brazil. *Am J Trop Med Hyg*. 2009 Mar;80(3):452-9.
95. Rosanas-Urgell A, Mueller D, Betuela I, Barnadas C, Iga J, Zimmerman PA, et al. Comparison of diagnostic methods for the detection and quantification of the four sympatric Plasmodium species in field samples from Papua New Guinea. *Malar J*. 2010;9:361.
96. Satoguina J, Walther B, Drakeley C, Nwakanma D, Oriero EC, Correa S, et al. Comparison of surveillance methods applied to a situation of low malaria prevalence at rural sites in The Gambia and Guinea Bissau. *Malar J*. 2009;8:274.
97. Lin E, Kiniboro B, Gray L, Dobbie S, Robinson L, Laumaea A, et al. Differential patterns of infection and disease with P. falciparum and P. vivax in young Papua New Guinean children. *PLoS One*. 2010;5(2):e9047.
98. Steenkeste N, Rogers WO, Okell L, Jeanne I, Incardona S, Duval L, et al. Sub-microscopic malaria cases and mixed malaria infection in a remote area of high malaria endemicity in Rattanakiri province, Cambodia: implication for malaria elimination. *Malar J*. 2010;9:108.
99. Katsuragawa TH, Gil LH, Tada MS, de Almeida e Silva A, Costa JD, Araujo Mda S, et al. The dynamics of transmission and spatial distribution of malaria in riverside areas of Porto Velho, Rondonia, in the Amazon region of Brazil. *PLoS One*. 2010;5(2):e9245.
100. da Silva NS, da Silva-Nunes M, Malafrente RS, Menezes MJ, D'Arcadia RR, Komatsu NT, et al. Epidemiology and control of frontier malaria in Brazil: lessons from community-based studies in rural Amazonia. *Trans R Soc Trop Med Hyg*. 2010 May;104(5):343-50.
101. Marfurt J, Smith TA, Hastings IM, Muller I, Sie A, Oa O, et al. Plasmodium falciparum resistance to anti-malarial drugs in Papua New Guinea: evaluation of a community-based approach for the molecular monitoring of resistance. *Malar J*. 2010;9:8.
102. Malaria on isolated Melanesian islands prior to the initiation of malaria elimination activities. *Malar J*. 2010;9:218.

103. Liljander A, Bejon P, Mwacharo J, Kai O, Ogada E, Peshu N, et al. Clearance of asymptomatic *P. falciparum* Infections Interacts with the number of clones to predict the risk of subsequent malaria in Kenyan children. *PLoS One*. 2011;6(2):e16940.
104. Gahutu JB, Steininger C, Shyirambere C, Zeile I, Cwinya-Ay N, Danquah I, et al. Prevalence and risk factors of malaria among children in southern highland Rwanda. *Malar J*. 2011;10:134.
105. Steenkeste N, Incardona S, Chy S, Duval L, Ekala MT, Lim P, et al. Towards high-throughput molecular detection of *Plasmodium*: new approaches and molecular markers. *Malar J*. 2009;8:86.
